# Supplementary material for: The different pathogeneses of sporadic adenoma and adenocarcinoma in non-ampullary lesions of the proximal and distal duodenum
Source: PubMed Central journal article supplement (PMC5522249; doi:10.18632/oncotarget.17051), 2017-04-12
Supplement: oncotarget-08-41078-s001.pdf [file oncotarget-08-41078-s001.pdf]

# The different pathogeneses of sporadic adenoma and adenocarcinoma in non-ampullary lesions of the proximal and distal duodenum

## SUPPLEMENTARY MATERIALS

### SUPPLEMENTARY FIGURE

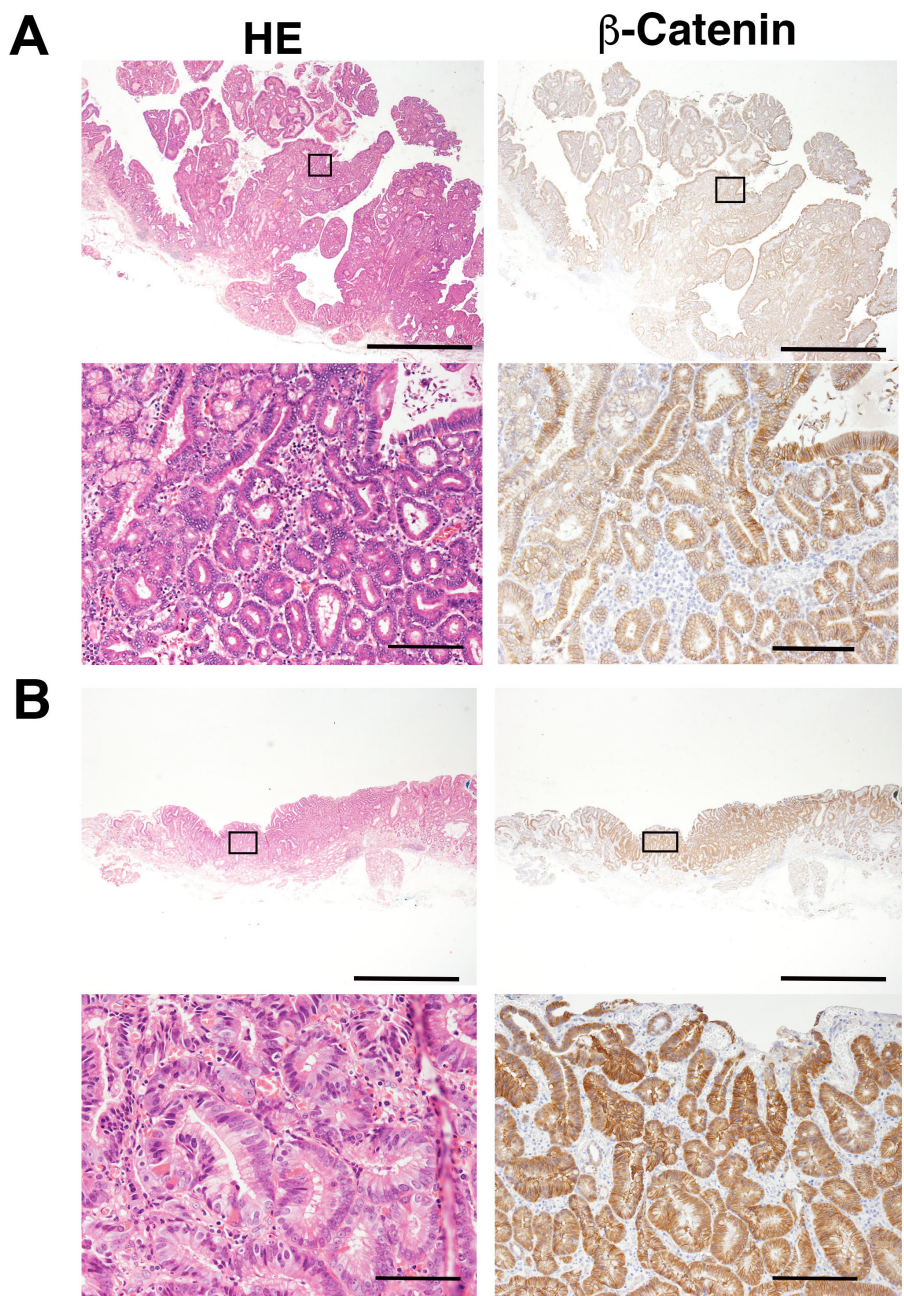

**Supplementary Figure 1:  $\beta$ -Catenin expression in representative duodenal adenocarcinomas. (A) membranous  $\beta$ -catenin (B) Nuclear and cytoplasmic  $\beta$ -catenin each in box indicate lower photo. Bars, upper panels; 500 $\mu$ m, lower panels, 20 $\mu$ m.**
